# Supplementary material
Source: publisher figshare collection journal article supplement (https://rs.figshare.com/ndownloader/files/7959529)
Supplement: Supplementary file 1 [file 7959529]

**Electronic Supplementary Information for:**

**COLOR, VISION AND COEVOLUTION IN AVIAN BROOD PARASITISM**

Mary Caswell Stoddard and Mark Hauber

**REFERENCE LIST FOR TABLE 1:**

1. Welbergen, J. A. & Davies, N. B. 2009 Strategic Variation in Mobbing as a Front Line of Defense against Brood Parasitism. *Curr. Biol.* **19**, 235–240. (doi:10.1016/j.cub.2008.12.041)

2. Davies, N. B. & Welbergen, J. A. 2008 Cuckoo–hawk mimicry? An experimental test. *Proc. R. Soc. London Ser. B.* **275**, 1817–1822. (doi:10.1098/rspb.2008.0331)

3. Welbergen, J. A. & Davies, N. B. 2011 A parasite in wolf's clothing: hawk mimicry reduces mobbing of cuckoos by hosts. *Behav. Ecol.* **22**, 574–579. (doi:10.1093/beheco/arr008)

4. Thorogood, R. & Davies, N. B. 2012 Cuckoos Combat Socially Transmitted Defenses of Reed Warbler Hosts with a Plumage Polymorphism. *Science* **337**, 578–580. (doi:10.1126/science.1220759)

5. Thorogood, R. & Davies, N. B. 2013 Hawk mimicry and the evolution of polymorphic cuckoos. *Chinese Birds* (doi:10.5122/cbirds.2013.0002)

6. Smith, J. & Arcese, P. 1994 Brown-Headed Cowbirds and an Island Population of Song Sparrows - a 16-Year Study. *Condor* **96**, 916–934.

7. Davies, N. B. 2011 Cuckoo adaptations: trickery and tuning. *J. Zool.* **284**, 1–14. (doi:10.1111/j.1469-7998.2011.00810.x)

8. Caves, E. M., Stevens, M., Iversen, E. S. & Spottiswoode, C. N. 2015 Hosts of avian brood parasites have evolved egg signatures with elevated information content. *Proc. R. Soc. London Ser. B.* **282**, 20150598. (doi:10.1098/rstb.1995.0073)

9. Stoddard, M. C., Kilner, R. M. & Town, C. 2014 Pattern recognition algorithm reveals how birds evolve individual egg pattern signatures. *Nat. Comm.* **5**, 4117. (doi:10.1038/ncomms5117)

10. Langmore, N. E., Stevens, M., Maurer, G. & Kilner, R. M. 2009 Are dark cuckoo eggs cryptic in host nests? *Anim. Behav.* **78**, 461–468. (doi:10.1016/j.anbehav.2009.06.003)

11. Alvarez, F. 1999 Attractive non-mimetic stimuli in Cuckoo *Cuculus canorus* eggs. *Ibis* **141**, 142–144.

12. Honza, M., Sulc, M., Jelinek, V., Pozgayova, M. & Procházka, P. 2013 Brood parasites lay eggs matching the appearance of host clutches. *Proc. R. Soc. London Ser. B.* **281**, 20132665–20132665. (doi:10.1093/beheco/art004)

13. Baerends, G. P. & Drent, R. H. 1982 The Herring Gull and Its Egg Part II. The Responsiveness to Egg-Features. *Behaviour* **82**, 1–416.

14. Cunningham, E. J. & Russell, A. F. 2000 Egg investment is influenced by male attractiveness in the mallard. *Nature* **404**, 74–77. (doi:10.1038/35003565)

15. Langmore, N. E., Hunt, S. & Kilner, R. M. 2003 Escalation of a coevolutionary arms race through host rejection of brood parasitic young. *Nature* **422**, 157–160. (doi:10.1038/nature01460)

16. Tokue, K. & Ueda, K. 2010 Mangrove Gerygones *Gerygone laevigaster* eject Little Bronze‐cuckoo *Chalcites minutillus* hatchlings from parasitized nests. *Ibis*

17. Sato, N. J., Tokue, K., Noske, R. A., Mikami, O. K. & Ueda, K. 2010 Evicting cuckoo nestlings from the nest: a new anti-parasitism behaviour. *Biol. Lett.* **6**, 67–69. (doi:10.1038/nature01460)

18. Sato, N. J., Tanaka, K. D., Okahisa, Y., Yamamichi, M., Kuehn, R., Gula, R., Ueda, K. & Theuerkauf, J. 2015 Nestling polymorphism in a cuckoo-host system. *Curr. Biol.* **25**, R1164–R1165. (doi:10.1016/j.cub.2015.11.028)

19. Langmore, N. E., Stevens, M., Maurer, G., Heinsohn, R., Hall, M. L., Peters, A. & Kilner, R. M. 2011 Visual mimicry of host nestlings by cuckoos. *Proc. R. Soc. London Ser. B.* **278**, 2455–2463. (doi:10.1098/rspb.2010.2391)

20. Payne, R. B. 2005 Nestling mouth markings and colors of Old World finches Estrildidae: mimicry and coevolution of nesting finches and their Vidua brood parasites. *Miscellaneous Publications of the Museum of Zoology, University of Michigan* **194**, 1–44.

21. Tanaka, K. D. 2005 Horsfield's Hawk-Cuckoo Nestlings Simulate Multiple Gapes for Begging. *Science* **308**, 653–653. (doi:10.1126/science.1109957)

22. Tanaka, K. D., Morimoto, G., Stevens, M. & Ueda, K. 2011 Rethinking visual supernormal stimuli in cuckoos: visual modeling of host and parasite signals. *Behav. Ecol.* **22**, 1012–1019. (doi:10.1093/beheco/arr084)

23. Noble, D. G., Davies, N. B. & Hartley, I. R. 1999 The red gape of the nestling cuckoo (*Cuculus canorus*) is not a supernormal stimulus for three common hosts. *…*

24. Bolopo, D., Canestrari, D., Roldán, M., Baglione, V. & Soler, M. 2015 High begging intensity of great spotted cuckoo nestlings favours larger-size crow nest mates. *Behav. Ecol. Sociobiol.* **69**, 873–882.

25. Hauber, M. E. & Kilner, R. M. 2006 Coevolution, communication, and host chick mimicry in parasitic finches: who mimics whom? *Behav. Ecol. Sociobiol.* **61**, 497–503. (doi:10.1007/s00265-006-0291-0)

26. Gill, S. A. & Sealy, S. G. 2004 Functional reference in an alarm signal given during nest defence: seet calls of yellow warblers denote brood-parasitic brown-headed cowbirds. *Behav. Ecol. Sociobiol.* **56**, 71–80. (doi:10.1007/s00265-003-0736-7)

27. Langmore, N. E., Feeney, W. E., Crowe-Riddell, J., Luan, H., Louwrens, K. M. & Cockburn, A. 2012 Learned recognition of brood parasitic cuckoos in the superb fairy-wren Malurus cyaneus. *Behav. Ecol.* **23**, 798–805. (doi:10.1093/beheco/ars033)

28. Parejo, D. & Avilés, J. M. 2006 Do avian brood parasites eavesdrop on heterospecific sexual signals revealing host quality? A review of the evidence. *Anim Cogn* **10**, 81–88. (doi:10.1007/s10071-006-0055-2)

29. Colombelli-Négrel, D., Hauber, M. E., Robertson, J., Sulloway, F. J., Hoi, H., Griggio, M. & Kleindorfer, S. 2012 Embryonic Learning of Vocal Passwords in Superb Fairy-Wrens Reveals Intruder Cuckoo Nestlings. *Curr. Biol.* **22**, 2155–2160. (doi:10.1016/j.cub.2012.09.025)

30. Anderson, M. G., Ross, H. A., Brunton, D. H. & Hauber, M. E. 2009 Begging call matching between a specialist brood parasite and its host: a comparative approach to detect coevolution. *Biol. J. Linn. Soc.* **98**, 208–216.

31. Langmore, N. E., Maurer, G., Adcock, G. J. & Kilner, R. M. 2012 Socially acquired host-specific mimicry and the evolution of host races in Horsfield's Bronze-cuckoo *Chalcites* *basalis*. *Evolution* **279**, 1689–1699. (doi:10.1111/j.1558-5646.2008.00405.x)

32. Kilner, R. M., Noble, D. G. & Davies, N. B. 1999 Signals of need in parent-offspring communication and their exploitation by the common cuckoo. *Nature* **397**, 667–672.

33. Dearborn, D. C. 1999 Brown-headed Cowbird nestling vocalizations and risk of nest predation. *Auk* **116**, 448–457.

34. Hauber, M. E., Russo, S. A. & Sherman, P. W. 2001 A password for species recognition in a brood-parasitic bird. *Proc. R. Soc. London Ser. B.* **268**, 1041–1048. (doi:10.1098/rspb.2001.1617)

35. Soler, J. J., Perez-Contreras, T., De Neve, L., Macías-Sánchez, E., Møller, A. P. & Soler, M. 2014 Recognizing odd smells and ejection of brood parasitic eggs. An experimental test in magpies of a novel defensive trait against brood parasitism. *J. Evol. Biol.* **27**, 1265–1270. (doi:10.1111/jeb.12377)

36. Gloag, R., Fiorini, V. D., Reboreda, J. C. & Kacelnik, A. 2013 The wages of violence: mobbing by mockingbirds as a frontline defence against brood-parasitic cowbirds. *Anim. Behav.* **86**, 1023–1029. (doi:10.1016/j.anbehav.2013.09.007)

37. Guigueno, M. F., Sealy, S. G. & Westphal, A. M. 2014 Rejection of parasitic eggs in passerine hosts: Size matters more for a non-ejecter. *Auk* **131**, 583–594. (doi:10.1642/AUK-14-36.1)

38. Langmore, N. E. 2005 The evolution of egg rejection by cuckoo hosts in Australia and Europe. *Behav. Ecol.* **16**, 686–692. (doi:10.1093/beheco/ari041)

39. Davies, N. & Brooke, M. L. 1988 Cuckoos versus reed warblers: adaptations and counteradaptations. *Anim. Behav.* **36**, 262–284.

40. Spottiswoode, C. N. 2010 The evolution of host-specific variation in cuckoo eggshell strength. *J. Evol. Biol.* **23**, 1792–1799. (doi:10.1111/j.1420-9101.2010.02010.x)

41. Grim, T. 2007 Experimental evidence for chick discrimination without recognition in a brood parasite host. *Proc. R. Soc. London Ser. B.* **274**, 373–381. (doi:10.1098/rspb.2006.3731)
